# Supplementary material for: A real-time ratiometric fluorescent probe for imaging of SO2 derivatives in mitochondria of living cells
Source: Royal Society of Chemistry journal article supplement (doi:10.1039/c9ra03207j), 2019-01-01
Supplement: c9ra03207j1.pdf [file c9ra03207j1.pdf]

# Supporting Information

## A real-time ratiometric fluorescent probe for imaging of SO<sub>2</sub> derivatives in mitochondria of living cells

Junwei Shi, Wei Shu, Yong Tian, Yulong Wu, Jing Jing \*, Rubo Zhang\* and Xiaoling Zhang \*

Key Laboratory of Cluster Science of Ministry of Education, Beijing Key Laboratory of Photoelectronic/Electrophotonic Conversion Materials, School of Chemistry and Chemical Engineering, Beijing Institute of Technology, Beijing 100081, P. R. China

E-mail: zhangxl@bit.edu.cn; zhangrubo@bit.edu.cn; hellojane@bit.edu.cn.

Fax: +86-10-88875298; Tel: +86-10-88875298.

### Contents

1. The photostability of IN-CZ.
2. The respond time of IN-CZ.
3. The effect of pH.
4. The characterization data of IN-CZ.

## 1. The photostability of IN-CZ.

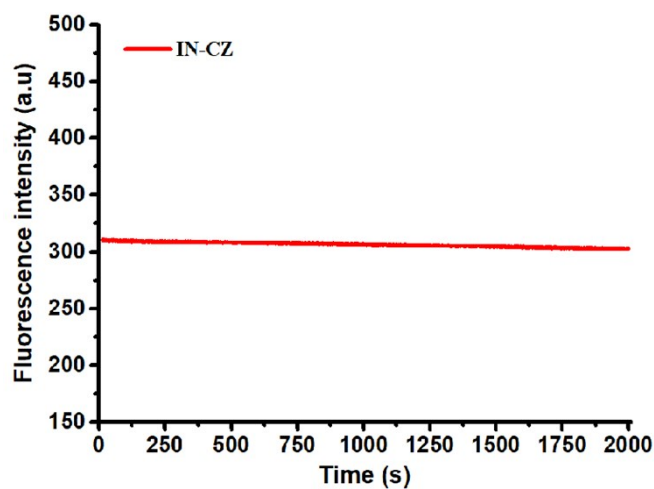

**Fig.S1.** The photostability of IN-CZ (10  $\mu$ M) upon continuous laser excitation at 420 nm. (pH = 7.4, PBS = 10 mM)

## 2. The respond time of IN-CZ.

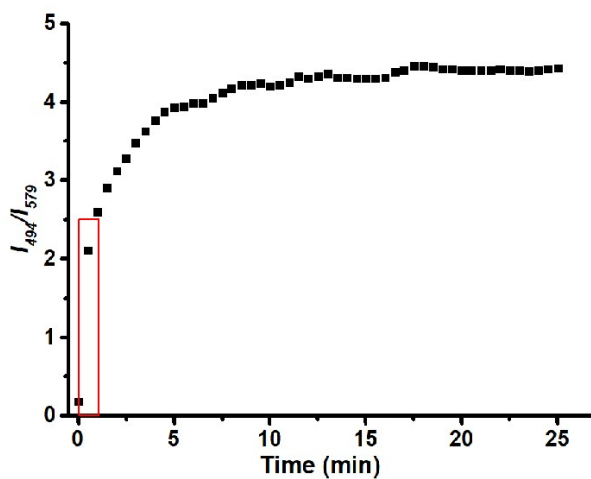

**Fig.S2.** Fluorescence intensity ratio of IN-CZ (10  $\mu$ M) at  $I_{494}/I_{579}$ , after interaction with  $\text{SO}_3^{2-}/\text{HSO}_3^-$  (50  $\mu$ M). The reaction was performed in PBS solution (pH = 7.4, 10 mM). Excitation at 420 nm.

### 3. The effect of pH.

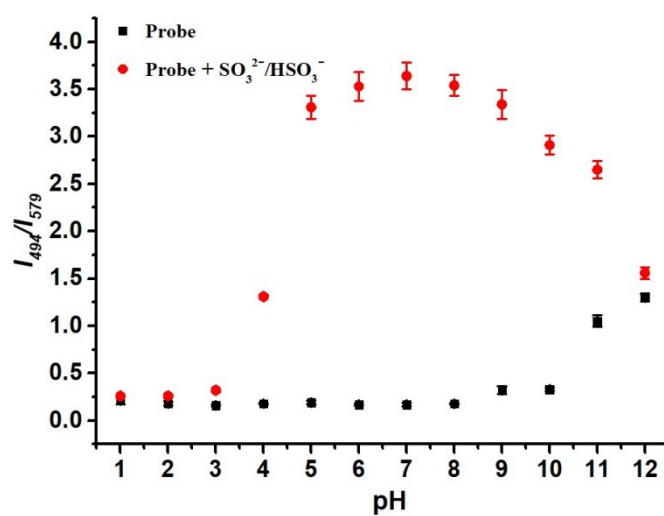

**Fig.S3.** The relative fluorescence intensity of probe IN-CZ (10  $\mu$ M) in the absence and presence of  $\text{SO}_3^{2-}/\text{HSO}_3^-$  (100  $\mu$ M) with different pH value (1-12) of PBS buffer solution (PBS = 10 mM). Excitation at 420 nm.

### 4. The characterization data of IN-CZ.

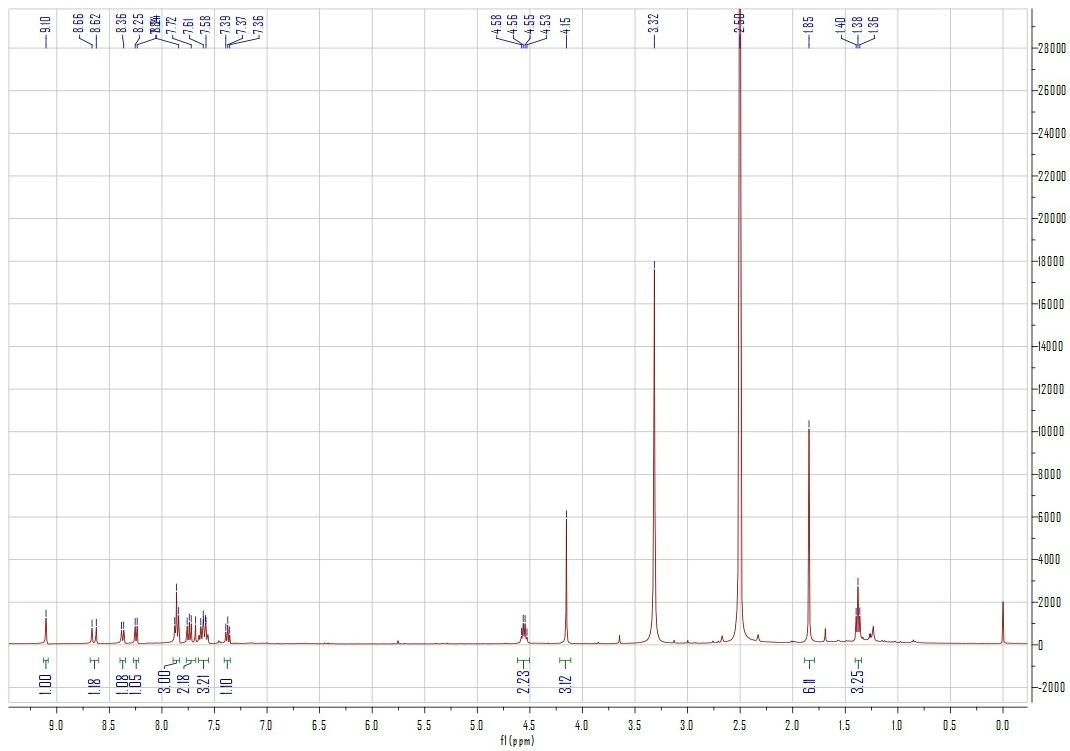

IN-CZ <sup>1</sup>H NMR

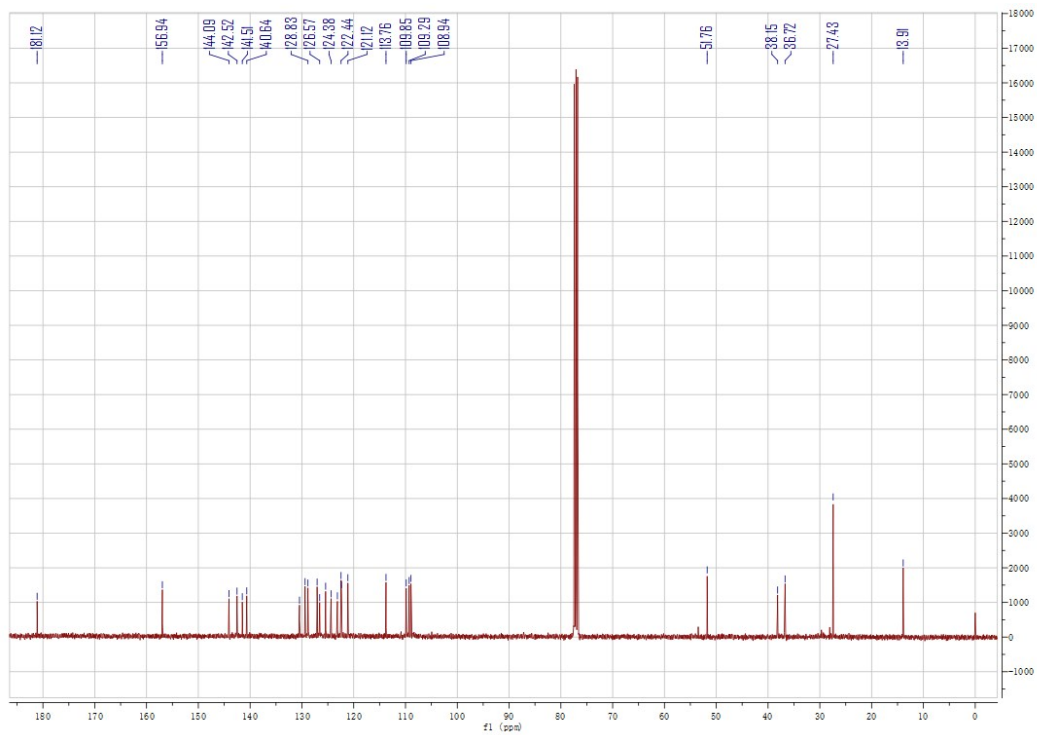

# IN-CZ <sup>13</sup>C NMR

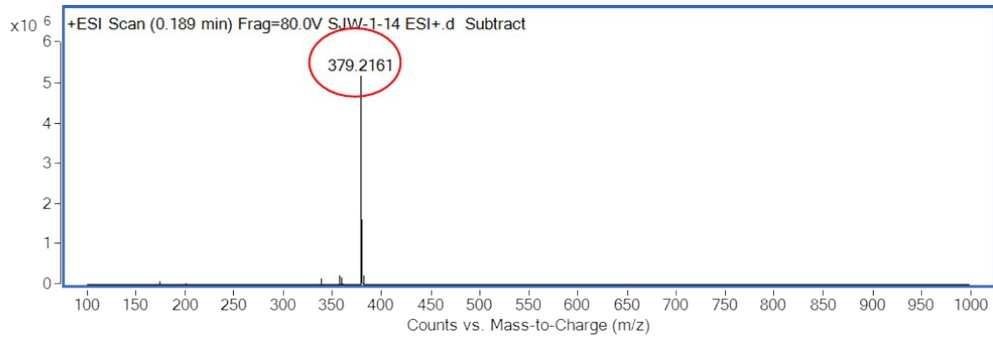

ESI- MS spectrum of probe **IN-CZ**
